# Supplementary material
Source: HighWire-hosted journal article supplement (https://openheart.bmj.com/content/10/2/e002332)
Supplement: inline-supplementary-material-1 [file inline-supplementary-material-1.pdf]

## Supplementary material

### Contents

Figure S1: Study population diagram

Table S1: Codelists for defining our chronic kidney disease, heart failure and type 2 diabetes cohorts

Table S2: Baseline characteristics of the cohort stratified by the order of CKD, HF or T2D disease diagnoses

Figure S3: Kaplan-Meier analysis of the risks of development of third condition, all-cause mortality and cardiovascular mortality in disease pairs, stratified by order of first two conditions

Figure S4: Risk of cardiovascular death in disease pairs of heart failure, chronic kidney disease and type 2 diabetes, using multivariable Cox regression models on multiply imputed data.

Figure S5: Restricted cubic splines to model continuous biomarkers in the multivariable Cox regression models on multiple imputed data: Risk of cardiovascular death in disease pairs of heart failure, chronic kidney disease and type 2 diabetes

Figure S6: Risk factors for developing third condition in disease pairs of heart failure, chronic kidney disease and type 2 diabetes, using multivariable Cox regression models on multiply imputed data, in the subgroup of the study population aged >60 years at baseline

Figure S7: Restricted cubic splines to model continuous biomarkers in the multivariable Cox regression models on multiple imputed data: Risk factors for developing a third condition in disease pairs of heart failure, chronic kidney disease and type 2 diabetes, in the subgroup of the study population aged >60 years at baseline

Figure S8: Risk factors for all-cause mortality in disease pairs of heart failure, chronic kidney disease and type 2 diabetes, using multivariable Cox regression models on multiply imputed data, in the subgroup of the study population aged >60 years at baseline

Figure S9: Restricted cubic splines to model continuous biomarkers in the multivariable Cox regression models on multiple imputed data: Risk of all-cause mortality in disease pairs of heart failure, chronic kidney disease and type 2 diabetes, in the subgroup of the study population aged >60 years at baseline

Figure S10: Risk factors for cardiovascular death in disease pairs of heart failure, chronic kidney disease and type 2 diabetes, using multivariable Cox regression models on multiply imputed data, in the subgroup of the study population aged >60 years at baseline

Figure S11: Restricted cubic splines to model continuous biomarkers in the multivariable Cox regression models on multiple imputed data: Risk of cardiovascular death in disease pairs of heart failure, chronic kidney disease and type 2 diabetes, in the subgroup of the study population aged >60 years at baseline

Figure S12: Risk factors for developing third condition in disease pairs of heart failure, chronic kidney disease and type 2 diabetes, using multivariable Cox regression models on complete case data.

Figure S13: Restricted cubic splines to model continuous biomarkers in the multivariable Cox regression models on complete case data: Risk factors for developing a third condition in disease pairs of heart failure, chronic kidney disease and type 2 diabetes

Figure S14: Risk of all-cause mortality in disease pairs of heart failure, chronic kidney disease and type 2 diabetes, using multivariable Cox regression models on complete case data

Figure S15: Restricted cubic splines to model continuous biomarkers in the multivariable Cox regression models on complete case data: Risk of all-cause mortality in disease pairs of heart failure, chronic kidney disease and type 2 diabetes

Figure S16: Risk of cardiovascular death in disease pairs of heart failure, chronic kidney disease and type 2 diabetes, using multivariable Cox regression models on complete case data

Figure S17: Restricted cubic splines to model continuous biomarkers in the multivariable Cox regression models on complete case data: Risk of cardiovascular death in disease pairs of heart failure, chronic kidney disease and type 2 diabetes

Figure S18: Cumulative incidence functions estimating the probability of patients being diagnosed with a third condition in the presence of the competing risk of all-cause mortality

Figure S19: Risk factors for developing third condition in disease pairs of heart failure, chronic kidney disease and type 2 diabetes, using multivariable Fine and Grey regression models on complete case data.

Figure S20: Restricted cubic splines to model continuous biomarkers in the multivariable Fine and Grey models on complete case data: Risk factors for developing a third condition in disease pairs of heart failure, chronic kidney disease and type 2 diabetes

Figure S21: Observed rate of healthcare utilisation in primary care setting

Figure S22: Observed rate of healthcare utilisation in hospital setting

Figure S1: Study population diagram

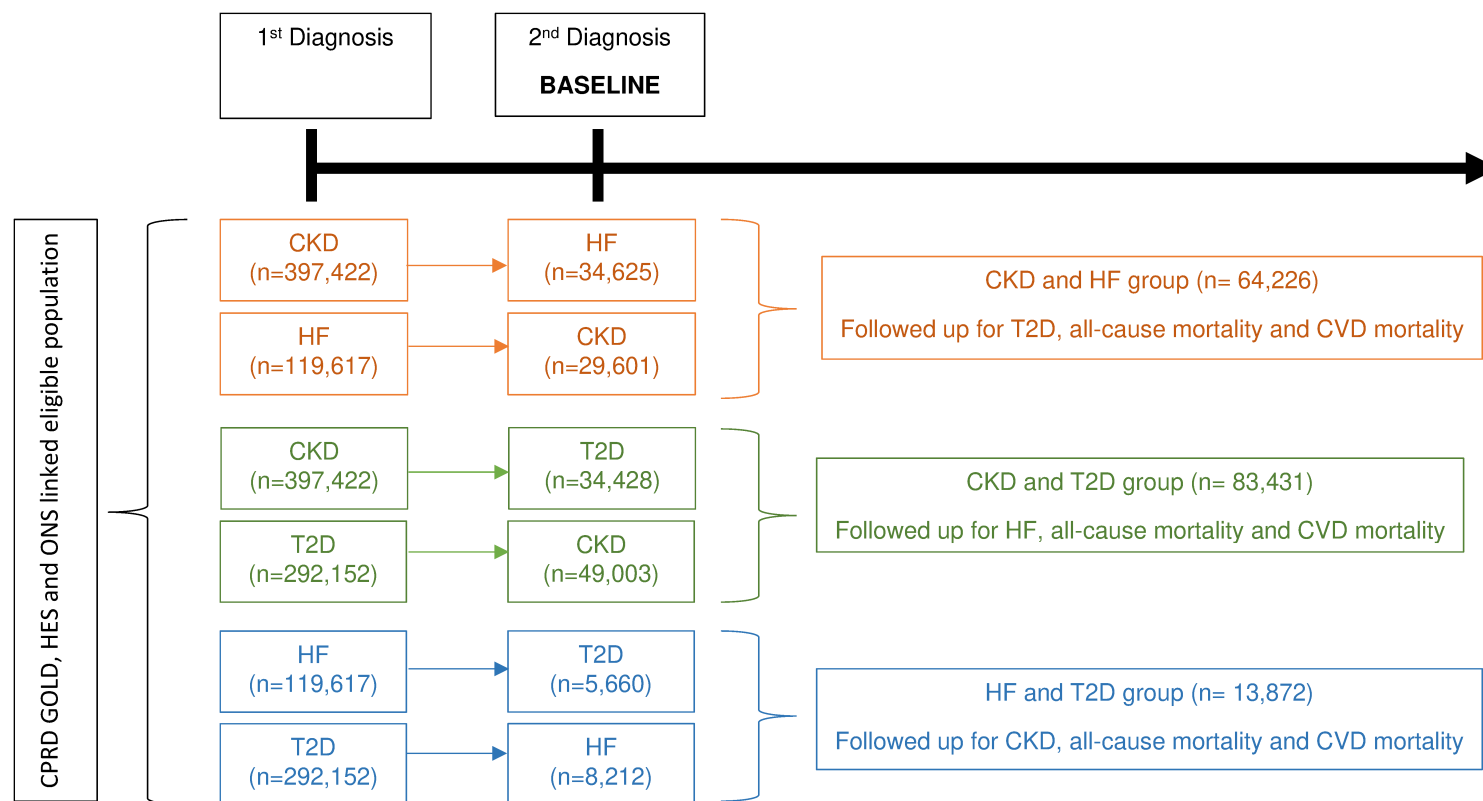

Table S1: Codelists for defining our chronic kidney disease, heart failure and type 2 diabetes cohorts

|                               | Read code<br>(Primary care)                                                                                                                                                                                                                                                                                                                                                                                                                                                                                                                                                                                                                                                                                  | ICD-10<br>(Hospital<br>admissions)                                                                                    | Clinical<br>biomarkers<br>(primary<br>care) |
|-------------------------------|--------------------------------------------------------------------------------------------------------------------------------------------------------------------------------------------------------------------------------------------------------------------------------------------------------------------------------------------------------------------------------------------------------------------------------------------------------------------------------------------------------------------------------------------------------------------------------------------------------------------------------------------------------------------------------------------------------------|-----------------------------------------------------------------------------------------------------------------------|---------------------------------------------|
| <b>Chronic kidney disease</b> | 1Z12.00, 1Z13.00, 1Z14.00, 1Z15.00, 1Z16.00, 1Z1B.00, 1Z1C.00, 1Z1D.00, 1Z1E.00, 1Z1F.00, 1Z1G.00, 1Z1H.00, 1Z1J.00, 1Z1K.00, 1Z1L.00, 7B06300, 8L50.00, K01.00, K010.00, K011.00, K012.00, K013.00, K013.11, K013.12, K014.00, K015.00, K016.00, K017.00, K018.00, K019.00, K01A.00, K01B.00, K01w.00, K01w000, K01x000, K01x100, K01x111, K01x200, K01x300, K01x400, K01x411, K01y.00, K01z.00, K02.00, K02.11, K02.12, K020.00, K021.00, K022.00, K023.00, K02y.00, K02y000, K02y200, K02y300, K02yz00, K02z.00, K05.00, K05.11, K05.12, K050.00, K0D.00, K100.00, K100000, K100100, K100200, K100300, K100400, K100500, K100600, K100z00, SP08300, TB00100, TB00111, ZV42000                             | N18.3, N18.4, N18.5, T82.4, T86.1, Y60.2, Y61.2, Y62.2, Y84.1, Z49.0, Z49.1, Z49.2, Z94.0, Z99.2, N18.6, I77.0, N16.5 | eGFR                                        |
| <b>Heart failure</b>          | 14A6.00, 14AM.00, 1O1.00, 388D.00, 661M500, 662T.00, 662W.00, 662f.00, 662g.00, 662h.00, 662i.00, 662p.00, 679W100, 679X.00, 8B29.00, 8CL3.00, 8CMK.00, 8CMW800, 8CeC.00, 8H2S.00, 8HBE.00, 8HHz.00, 8Hk0.00, 9N2p.00, 9N6T.00, 9On.00, 9On0.00, 9On1.00, 9On2.00, 9On3.00, 9On4.00, 9Or.00, 9Or0.00, 9Or1.00, 9Or2.00, 9Or3.00, 9Or4.00, 9Or5.00, 9h1.00, 9h11.00, 9h12.00, 9hH.00, 9hH0.00, 9hH1.00, G1yz100, G210100, G211100, G21z100, G232.00, G234.00, G400.00, G41z.11, G554000, G554011, G58.00, G58.11, G580.00, G580.11, G580.12, G580.13, G580.14, G580000, G580100, G580200, G580300, G580400, G581.00, G581.11, G581.13, G581000, G582.00, G584.00, G58z.00, G58z.12, G5yy900, G5yyA00, ZRad.00 | I11.0, I13.0, I13.2, I50                                                                                              |                                             |
| <b>Type 2 diabetes</b>        | C108A11, C109.13, C109011, C109012, C109111, C109112, C109211, C109212, C109411, C109412, C109511, C109512, C109611, C109612, C109711, C109712, C109A11, C109B11, C109C11, C109C12, C109D11, C109D12, C109E11, C109E12, C109F11, C109F12, C109G11, C109G12, C109H11, C109H12, C109J00, C109J12, C10EA11, C10F.11, C10F000, C10F011, C10F100, C10F200, C10F211, C10F300, C10F311, C10F400, C10F411, C10F500, C10F600, C10F611, C10F700, C10F711, C10F900, C10F911, C10FA00, C10FA11, C10FB00, C10FB11, C10FC00, C10FD00, C10FD11, C10FE00, C10FE11, C10FF00, C10FG00, C10FH00, C10FJ00, C10FJ11, C10FL00, C10FL11, C10FM00, C10FM11, C10FN00, C10FP00, C10FQ00, C10FR00                                       | E10                                                                                                                   |                                             |

**Table S2: Baseline characteristics of the cohort stratified by the order of CKD, HF or T2D disease diagnoses**

| N                                            | CKD and HF            |                       | CKD and T2D            |                        | HF and T2D           |                      |
|----------------------------------------------|-----------------------|-----------------------|------------------------|------------------------|----------------------|----------------------|
|                                              | CKD then HF<br>34,625 | HF then CKD<br>29,601 | CKD then T2D<br>34,428 | T2D then CKD<br>49,003 | HF then T2D<br>5,660 | T2D then HF<br>8,212 |
| <b>Demographics and behaviours</b>           |                       |                       |                        |                        |                      |                      |
| Age (years), Mean (SD)                       | 81.5 (9.32)           | 78.2 (10.30)          | 73.8 (10.05)           | 71.5 (9.99)            | 69.5 (11.40)         | 71.2 (11.26)         |
| Age (years), range                           | 18.4, 109             | 18.7, 107             | 24.7, 109              | 18.6, 109              | 25.4, 105            | 20.2, 100            |
| Women                                        | 18878 (54.5)          | 14154 (47.8)          | 19765 (57.4)           | 24281 (49.6)           | 1871 (33.1)          | 2752 (33.5)          |
| Ethnicity                                    |                       |                       |                        |                        |                      |                      |
| White                                        | 22514 (65)            | 16607 (56.1)          | 22133 (64.3)           | 29352 (59.9)           | 2991 (52.8)          | 4226 (51.5)          |
| Black                                        | 175 (0.5)             | 114 (0.4)             | 339 (1)                | 577 (1.2)              | 37 (0.7)             | 65 (0.8)             |
| South Asian                                  | 302 (0.9)             | 233 (0.8)             | 604 (1.8)              | 1210 (2.5)             | 62 (1.1)             | 151 (1.8)            |
| Other                                        | 141 (0.4)             | 112 (0.4)             | 242 (0.7)              | 415 (0.8)              | 31 (0.5)             | 58 (0.7)             |
| Unknown                                      | 11493 (33.2)          | 12535 (42.3)          | 11110 (32.3)           | 17449 (35.6)           | 2539 (44.9)          | 3712 (45.2)          |
| Smoking status                               |                       |                       |                        |                        |                      |                      |
| Non-Smoker                                   | 6736 (19.5)           | 5830 (19.7)           | 7132 (20.7)            | 10390 (21.2)           | 812 (14.3)           | 1162 (14.2)          |
| Smoker                                       | 3399 (9.8)            | 3510 (11.9)           | 4195 (12.2)            | 6648 (13.6)            | 1005 (17.8)          | 1563 (19)            |
| Ex-Smoker                                    | 24047 (69.4)          | 19312 (65.2)          | 22732 (66)             | 31224 (63.7)           | 3686 (65.1)          | 5385 (65.6)          |
| Missing %                                    | 1.3                   | 3.2                   | 1.1                    | 1.5                    | 2.8                  | 1.2                  |
| Excess alcohol consumption                   | 12185 (35.2)          | 9552 (32.3)           | 11924 (34.6)           | 16811 (34.3)           | 2110 (37.3)          | 3446 (42)            |
| <b>Multimorbidity characteristics</b>        |                       |                       |                        |                        |                      |                      |
| Time between diagnoses (years), Median (IQR) | 4.08 (1.49, 7.49)     | 2.44 (0.76, 5.20)     | 3.36 (1.15, 6.49)      | 4.21 (1.67, 7.84)      | 3.05 (1.06, 5.96)    | 4.91 (1.94, 8.67)    |
| <b>Medical history</b>                       |                       |                       |                        |                        |                      |                      |
| Myocardial infarction                        | 8838 (25.5)           | 8856 (29.9)           | 3432 (10)              | 4259 (8.7)             | 1798 (31.8)          | 2328 (28.3)          |
| Unstable angina                              | 3208 (9.3)            | 3014 (10.2)           | 1217 (3.5)             | 1497 (3.1)             | 601 (10.6)           | 778 (9.5)            |
| Stable angina                                | 10773 (31.1)          | 10479 (35.4)          | 6458 (18.8)            | 7939 (16.2)            | 2194 (38.8)          | 2569 (31.3)          |
| Percutaneous coronary intervention           | 2407 (7)              | 2185 (7.4)            | 1424 (4.1)             | 1782 (3.6)             | 684 (12.1)           | 852 (10.4)           |
| Coronary artery bypass graft                 | 2721 (7.9)            | 2965 (10)             | 1251 (3.6)             | 1788 (3.6)             | 647 (11.4)           | 722 (8.8)            |
| Unspecified coronary heart disease           | 12360 (35.7)          | 12516 (42.3)          | 6566 (19.1)            | 7916 (16.2)            | 2703 (47.8)          | 2906 (35.4)          |
| Peripheral arterial disease                  | 1746 (5)              | 1144 (3.9)            | 662 (1.9)              | 886 (1.8)              | 195 (3.4)            | 331 (4)              |
| Ischaemic stroke                             | 1697 (4.9)            | 1053 (3.6)            | 765 (2.2)              | 1004 (2)               | 178 (3.1)            | 306 (3.7)            |
| Hypertension                                 | 25136 (72.6)          | 17392 (58.8)          | 24998 (72.6)           | 34409 (70.2)           | 3134 (55.4)          | 5448 (66.3)          |
| Atrial fibrillation                          | 15098 (43.6)          | 12964 (43.8)          | 4264 (12.4)            | 4621 (9.4)             | 2232 (39.4)          | 2834 (34.5)          |
| Chronic obstructive pulmonary disease        | 5972 (17.2)           | 5256 (17.8)           | 3435 (10)              | 4129 (8.4)             | 1122 (19.8)          | 1631 (19.9)          |
| Cancer                                       | 9266 (26.8)           | 6160 (20.8)           | 6384 (18.5)            | 8424 (17.2)            | 896 (15.8)           | 1582 (19.3)          |
| <b>Clinical Biomarkers</b>                   |                       |                       |                        |                        |                      |                      |
| Body mass index, Mean (SD)                   | 28.0 (6.18)           | 28.2 (6.21)           | 31.2 (6.26)            | 31.0 (6.35)            | 32.8 (7.16)          | 32.0 (7.12)          |
| Missing %                                    | 46.8                  | 45.5                  | 33.1                   | 16.8                   | 33.5                 | 19.6                 |
| Systolic blood pressure (mmHg), Mean (SD)    | 133 (20.1)            | 129 (19.9)            | 138 (16.8)             | 135 (17.3)             | 131 (18.3)           | 133 (18.7)           |
| Missing %                                    | 6.1                   | 8                     | 5.7                    | 5.4                    | 8.4                  | 5.5                  |
| Diastolic blood pressure (mmHg), Mean (SD)   | 73.8 (11.6)           | 72.3 (11.2)           | 76.8 (10.1)            | 74.9 (10.0)            | 75.6 (10.8)          | 75.5 (11.3)          |
| Missing %                                    | 6.1                   | 8                     | 5.7                    | 5.4                    | 8.4                  | 5.5                  |
| HbA1c, Median (IQR)                          | 45 (39.9, 55.2)       | 48 (41.0, 60.7)       | 52 (48.6, 61.0)        | 52 (46.0, 61.7)        | 54 (49.0, 65.0)      | 53 (46.0, 63.0)      |
| Missing %                                    | 75.9                  | 78.8                  | 39                     | 7.2                    | 42.3                 | 12.9                 |
| HDL (mg/dL), Median (IQR)                    | 1.30 (1.10, 1.61)     | 1.26 (1.00, 1.53)     | 1.20 (1.00, 1.44)      | 1.20 (1.00, 1.41)      | 1.10 (0.90, 1.30)    | 1.15 (0.96, 1.40)    |
| Missing %                                    | 48.4                  | 45.6                  | 27.6                   | 19.2                   | 32.5                 | 25.5                 |
| LDL (mg/dL), Median (IQR)                    | 2.20 (1.70, 2.88)     | 2.20 (1.70, 2.84)     | 2.50 (1.90, 3.20)      | 2.10 (1.60, 2.70)      | 2.22 (1.70, 2.90)    | 2.00 (1.56, 2.61)    |
| Missing %                                    | 60.7                  | 58.2                  | 43.3                   | 38.5                   | 47.5                 | 43.8                 |
| Triglycerides (mg/dL), Median (IQR)          | 1.20 (0.90, 1.70)     | 1.33 (1.00, 1.90)     | 1.80 (1.30, 2.51)      | 1.70 (1.20, 2.34)      | 1.83 (1.30, 2.60)    | 1.50 (1.06, 2.10)    |
| Missing %                                    | 54.9                  | 50.8                  | 33.7                   | 27.9                   | 38.8                 | 35.7                 |
| Creatinine, Median (IQR)                     | 112 (93, 138)         | 118 (103, 137)        | 101 (87, 119)          | 112 (96, 124)          | 85 (74, 99)          | 81 (69, 95)          |
| Missing %                                    | 9.8                   | 3.5                   | 5.5                    | 0.7                    | 12.8                 | 9                    |
| <b>Prescribed medication</b>                 |                       |                       |                        |                        |                      |                      |
| Ace Inhibitors                               | 22296 (64.4)          | 23318 (78.8)          | 19676 (57.2)           | 33774 (68.9)           | 4481 (79.2)          | 5839 (71.1)          |
| Beta blockers                                | 17385 (50.2)          | 16723 (56.5)          | 13211 (38.4)           | 17029 (34.8)           | 3528 (62.3)          | 4111 (50.1)          |
| Antiplatelets                                | 18953 (54.7)          | 17122 (57.8)          | 14408 (41.8)           | 23272 (47.5)           | 3062 (54.1)          | 4490 (54.7)          |
| Statins                                      | 19118 (55.2)          | 17325 (58.5)          | 21091 (61.3)           | 36097 (73.7)           | 3888 (68.7)          | 6093 (74.2)          |
| Diuretics                                    | 25506 (73.7)          | 25035 (84.6)          | 17689 (51.4)           | 23316 (47.6)           | 4090 (72.3)          | 5068 (61.7)          |
| Metformin                                    | 2154 (6.2)            | 2010 (6.8)            | 6971 (20.2)            | 29252 (59.7)           | 1239 (21.9)          | 5076 (61.8)          |
| Insulin                                      | 1784 (5.2)            | 1586 (5.4)            | 511 (1.5)              | 4203 (8.6)             | 144 (2.5)            | 872 (10.6)           |
| Non-steroidal anti-inflammatory drugs        | 7470 (21.6)           | 5399 (18.2)           | 8451 (24.5)            | 12306 (25.1)           | 1047 (18.5)          | 1764 (21.5)          |

**Figure S3: Kaplan-Meier analysis of the risks of development of third condition, all-cause mortality and cardiovascular mortality in disease pairs, stratified by order of first two conditions**

**CKD and HF**

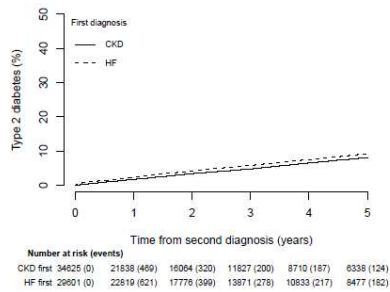

**CKD and T2D**

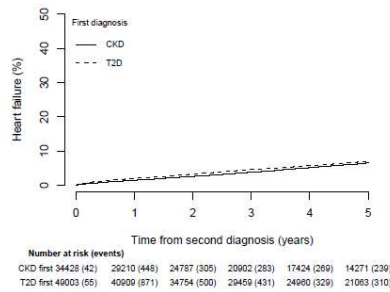

**HF and T2D**

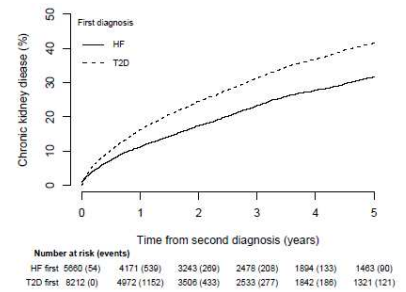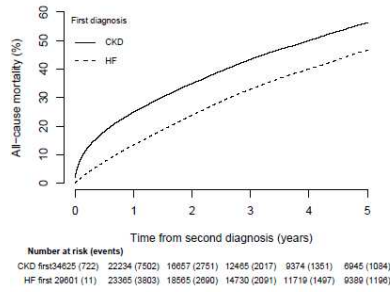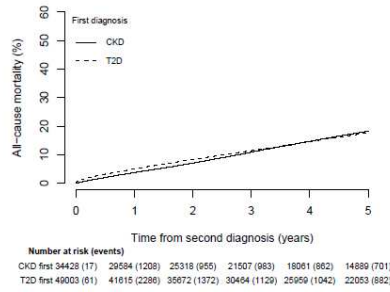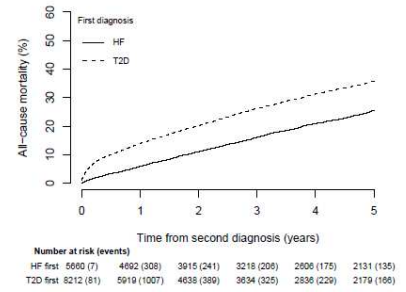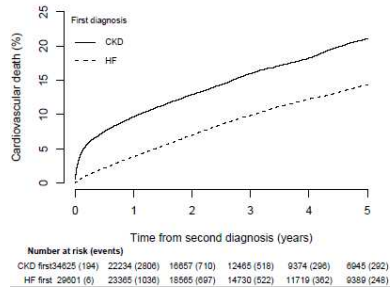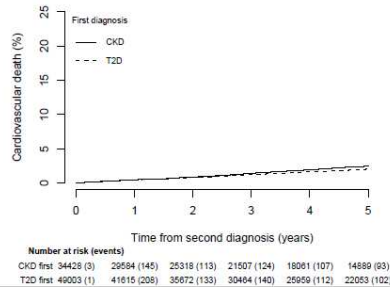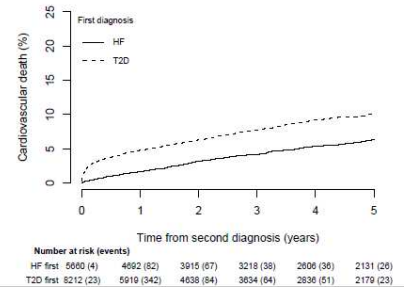

**Figure S4: Risk of cardiovascular death in disease pairs of heart failure, chronic kidney disease and type 2 diabetes, using multivariable Cox regression models on multiply imputed data.**

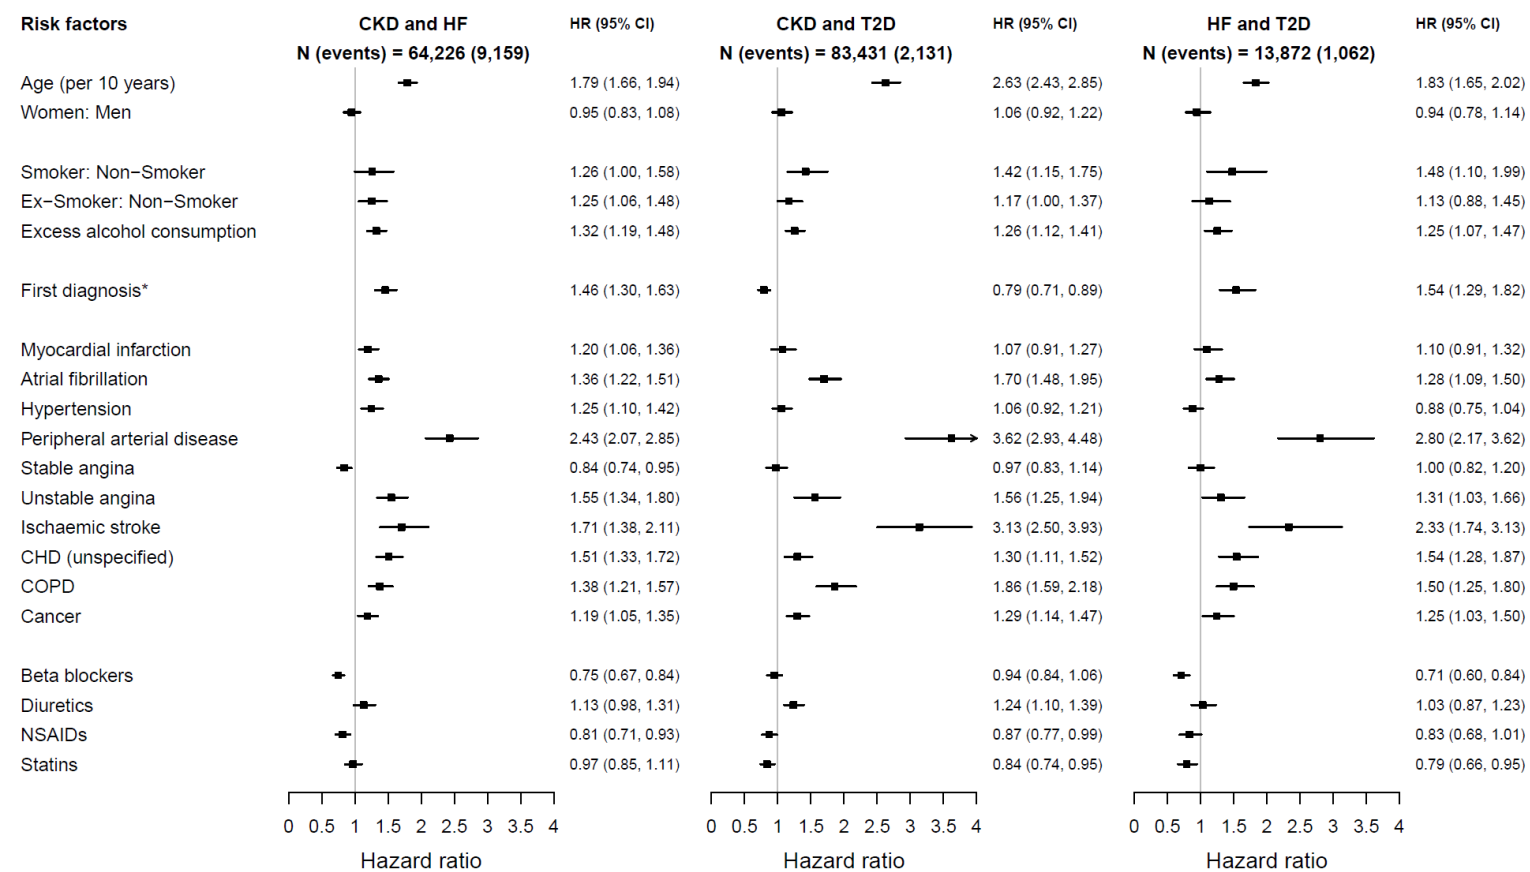

\*For first diagnosis, HF is the reference group for CKD and HF, CKD is the reference group for CKD and T2D and HF is the reference group for HF and T2D. The upper and lower limits for each point are the 95% confidence intervals. These models were also adjusted for the continuous variables modelled using restricted cubic splines displayed in figure S5.

**Figure S5: Restricted cubic splines to model continuous biomarkers in the multivariable Cox regression models on multiple imputed data: Risk of cardiovascular death in disease pairs of heart failure, chronic kidney disease and type 2 diabetes**

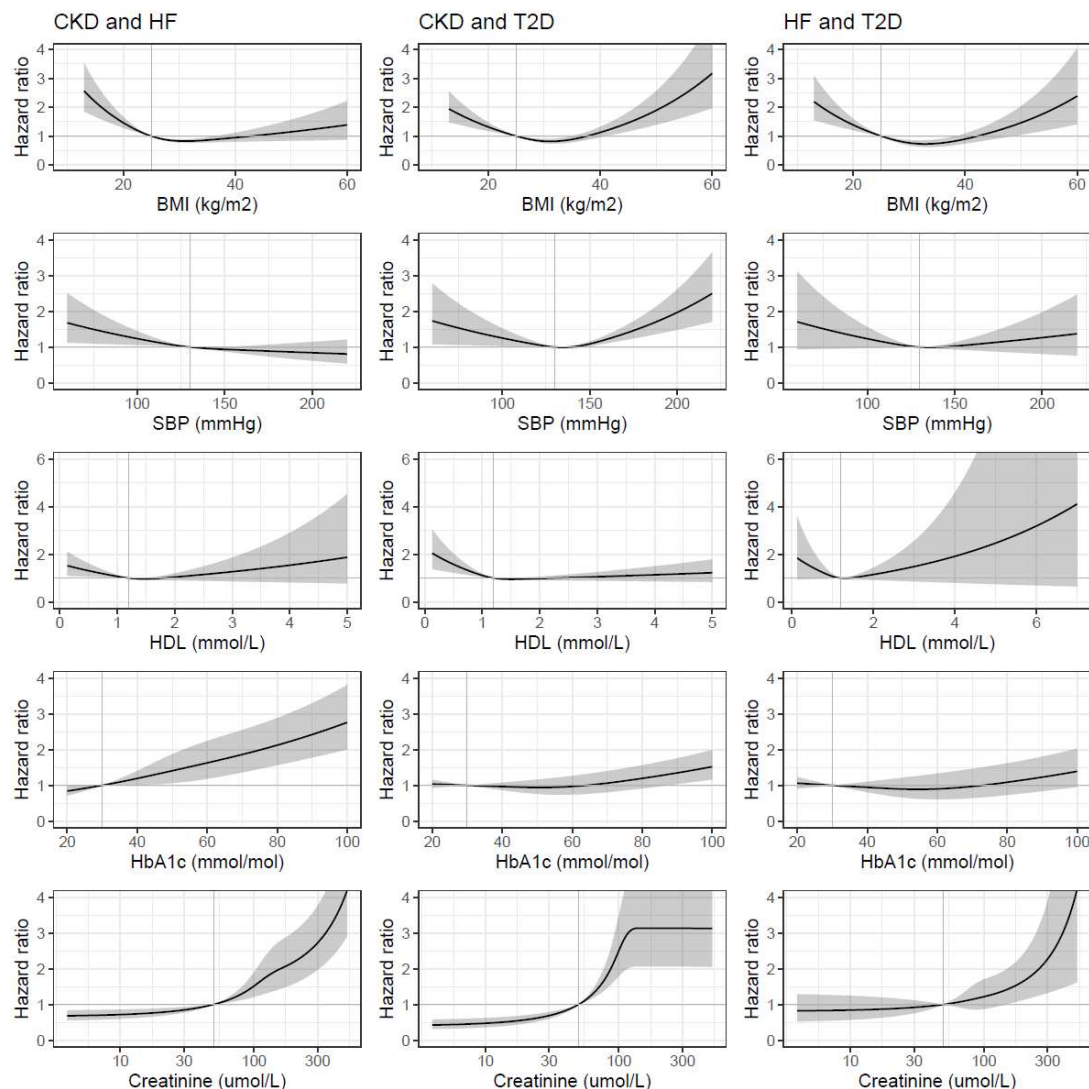

Note: The reference value for each risk factor was BMI: 25kg/m<sup>2</sup>, SBP: 130mmHg, HDL: .1.2mmol/L, HbA1c: 30 mmol/mol and creatinine: 50μmol/L. The shaded area in each panel is the 95% confidence interval. All estimates are from the fully adjusted model including the risk factors displayed in figure S4.



**Figure S6: Risk factors for developing third condition in disease pairs of heart failure, chronic kidney disease and type 2 diabetes, using multivariable Cox regression models on multiply imputed data, in the subgroup of the study population aged >60 years at baseline**

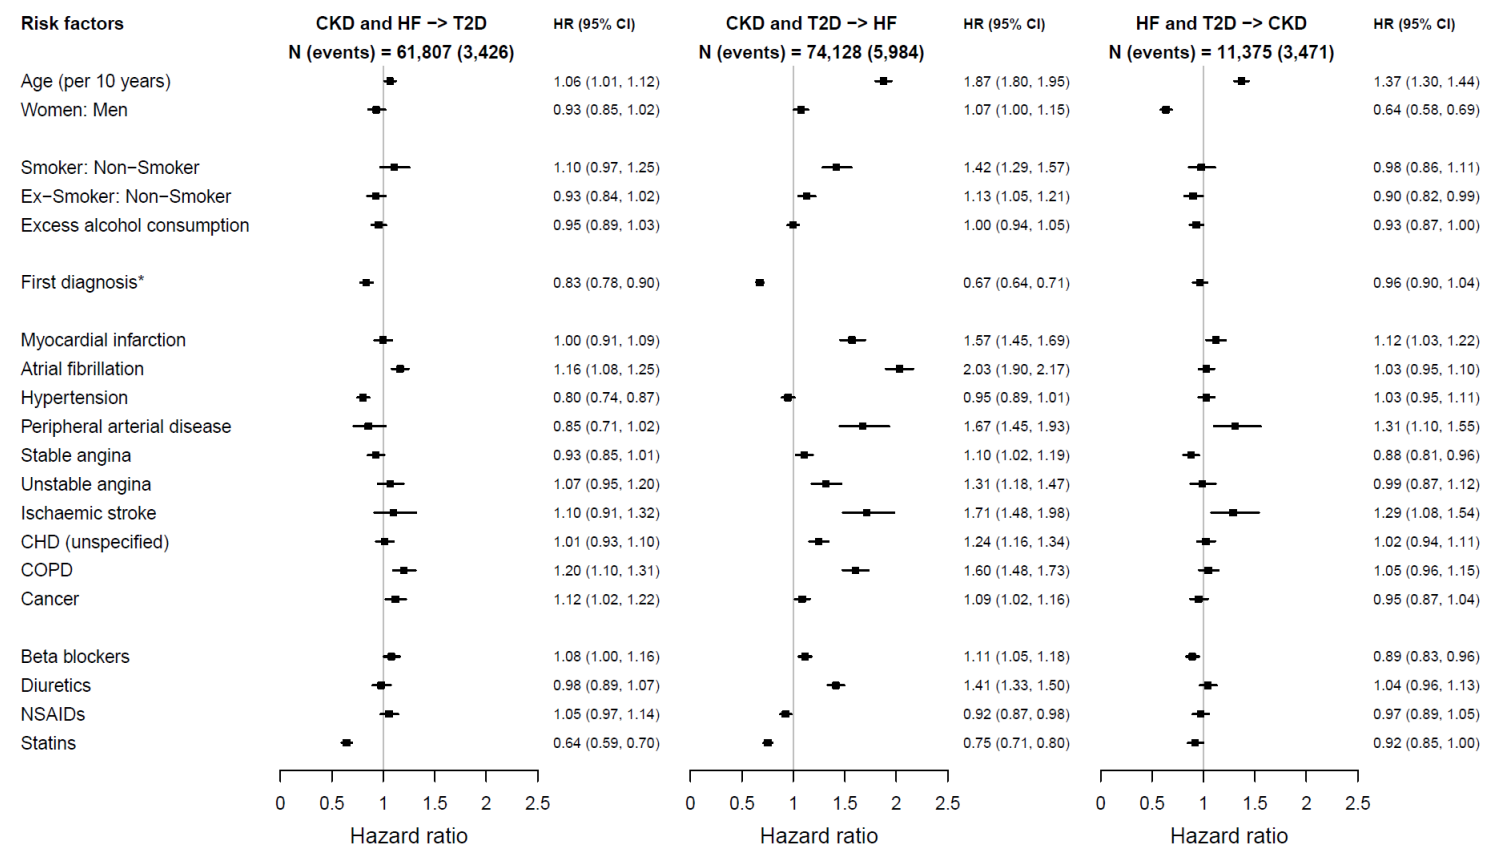

\*For first diagnosis, HF is the reference group for CKD and HF, CKD is the reference group for CKD and T2D and HF is the reference group for HF and T2D.

Note: The upper and lower limits for each point are the 95% confidence intervals. These models were also adjusted for the continuous variables modelled using restricted cubic splines displayed in figure S7.

**Figure S7: Restricted cubic splines to model continuous biomarkers in the multivariable Cox regression models on multiple imputed data: Risk factors for developing a third condition in disease pairs of heart failure, chronic kidney disease and type 2 diabetes, in the subgroup of the study population aged >60 years at baseline**

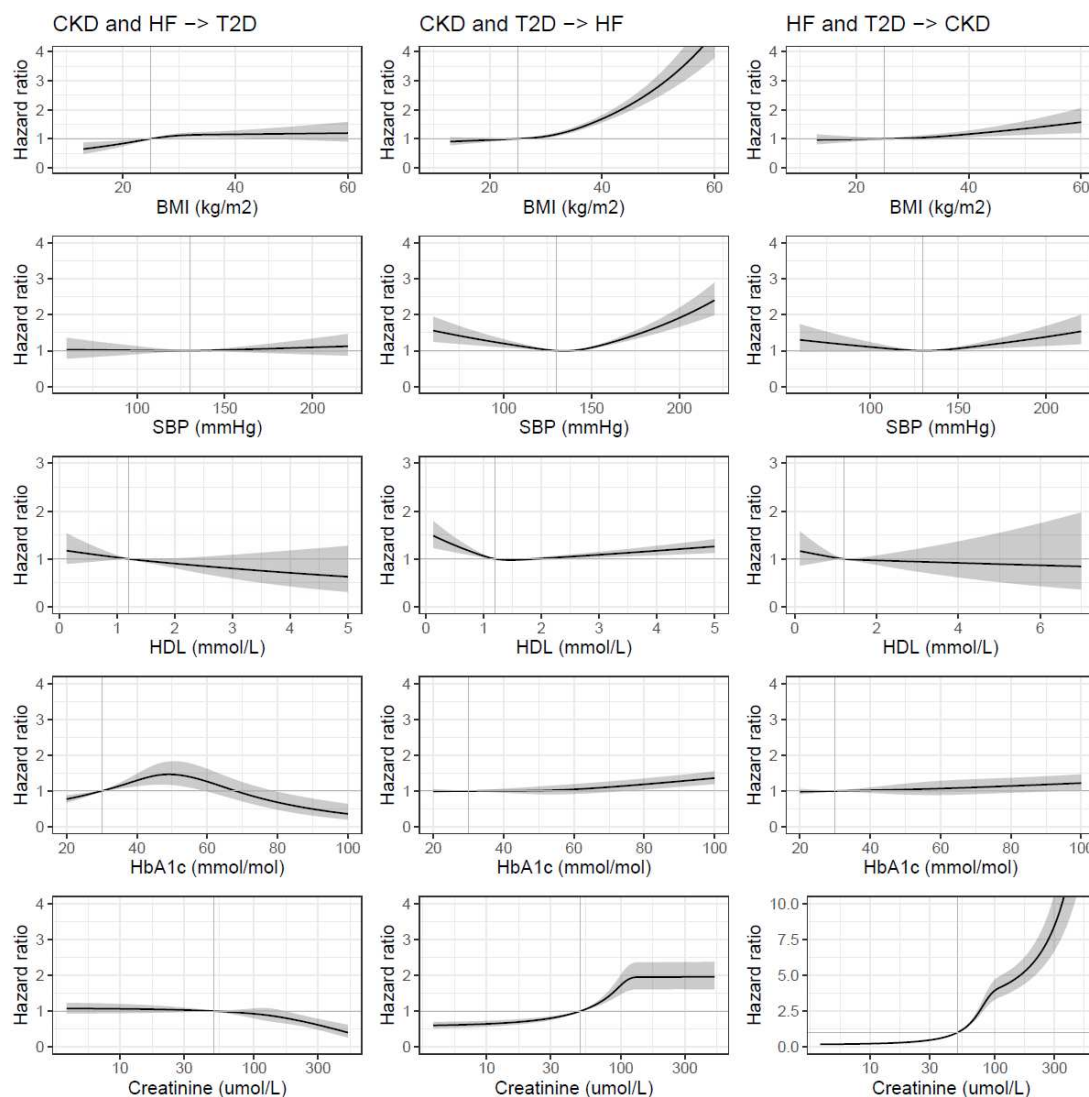

Note: The reference value for each risk factor was BMI: 25kg/m<sup>2</sup>, SBP: 130mmHg, HDL: .1.2mmol/L, HbA1c: 30 mmol/mol and creatinine: 50µmol/L. The shaded area in each panel is the 95% confidence interval. All estimates are from the fully adjusted model including the risk factors displayed in figure S6

**Figure S8: Risk factors for all-cause mortality in disease pairs of heart failure, chronic kidney disease and type 2 diabetes, using multivariable Cox regression models on multiply imputed data, in the subgroup of the study population aged >60 years at baseline**

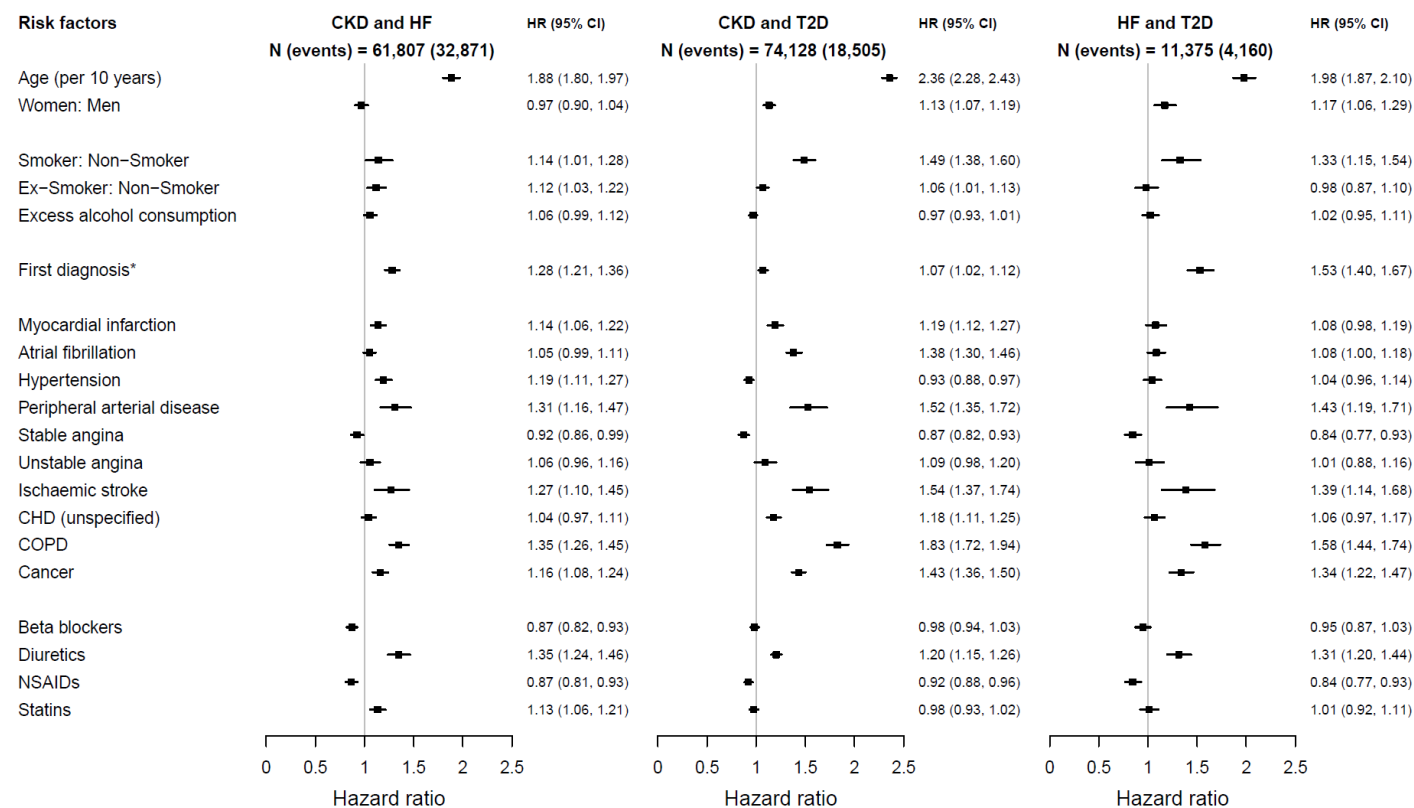

\*For first diagnosis, HF is the reference group for CKD and HF, CKD is the reference group for CKD and T2D and HF is the reference group for HF and T2D.

Note: The upper and lower limits for each point are the 95% confidence intervals. These models were also adjusted for the continuous variables modelled using restricted cubic splines displayed in figure S9.

**Figure S9: Restricted cubic splines to model continuous biomarkers in the multivariable Cox regression models on multiple imputed data: Risk of all-cause mortality in disease pairs of heart failure, chronic kidney disease and type 2 diabetes, in the subgroup of the study population aged >60 years at baseline**

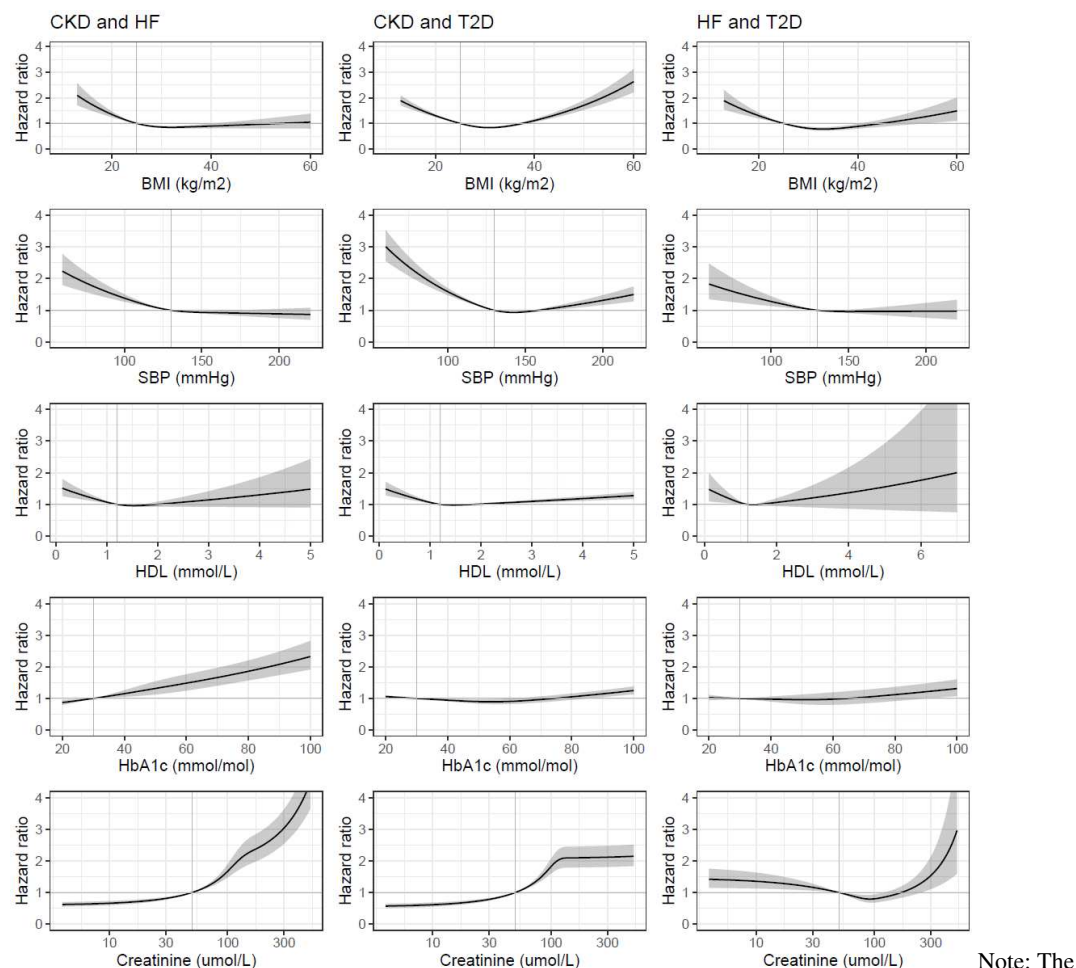

**Figure S10: Risk factors for cardiovascular death in disease pairs of heart failure, chronic kidney disease and type 2 diabetes, using multivariable Cox regression models on multiply imputed data, in the subgroup of the study population aged >60 years at baseline**

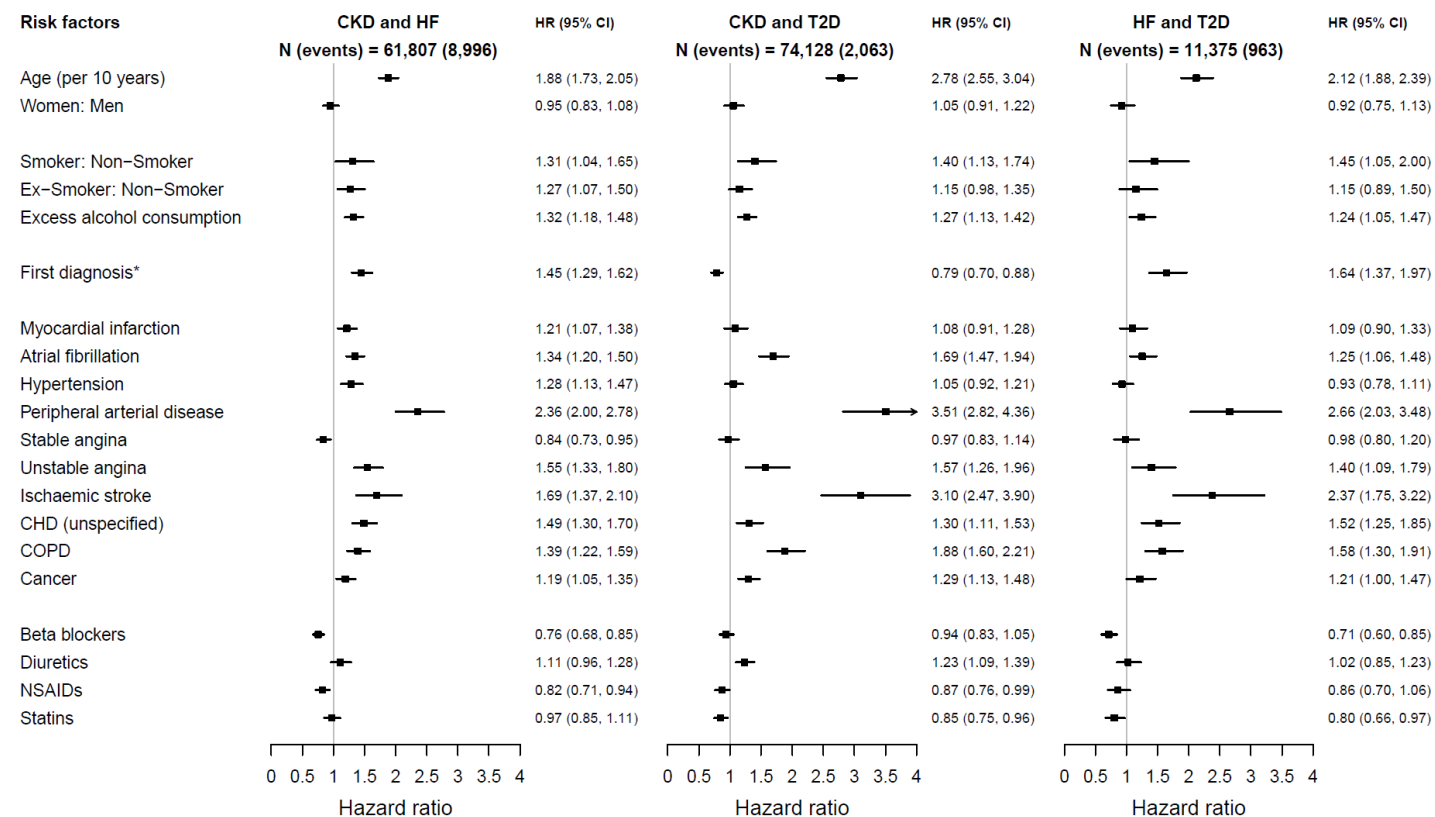

\*For first diagnosis, HF is the reference group for CKD and HF, CKD is the reference group for CKD and T2D and HF is the reference group for HF and T2D.

Note: The upper and lower limits for each point are the 95% confidence intervals. These models were also adjusted for the continuous variables modelled using restricted cubic splines displayed in figure S11.

**Figure S11: Restricted cubic splines to model continuous biomarkers in the multivariable Cox regression models on multiple imputed data: Risk of cardiovascular death in disease pairs of heart failure, chronic kidney disease and type 2 diabetes, in the subgroup of the study population aged >60 years at baseline**

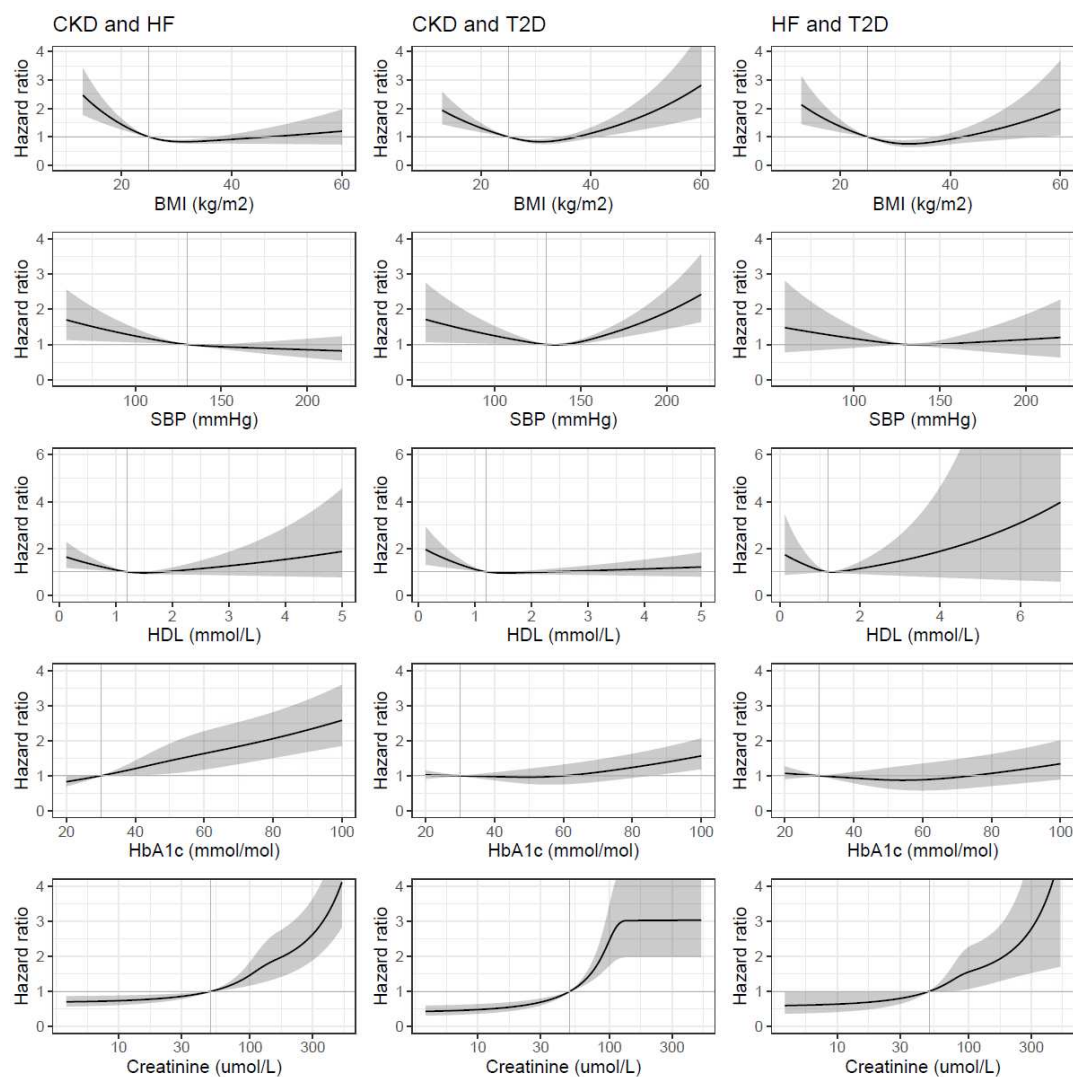

Note: The reference value for each risk factor was BMI: 25kg/m<sup>2</sup>, SBP: 130mmHg, HDL: .1.2mmol/L, HbA1c: 30 mmol/mol and creatinine: 50umol/L. The shaded area in each panel is the 95% confidence interval. All estimates are from the fully adjusted model including the risk factors displayed in figure S11

**Figure S12: Risk factors for developing third condition in disease pairs of heart failure, chronic kidney disease and type 2 diabetes, using multivariable Cox regression models on complete case data.**

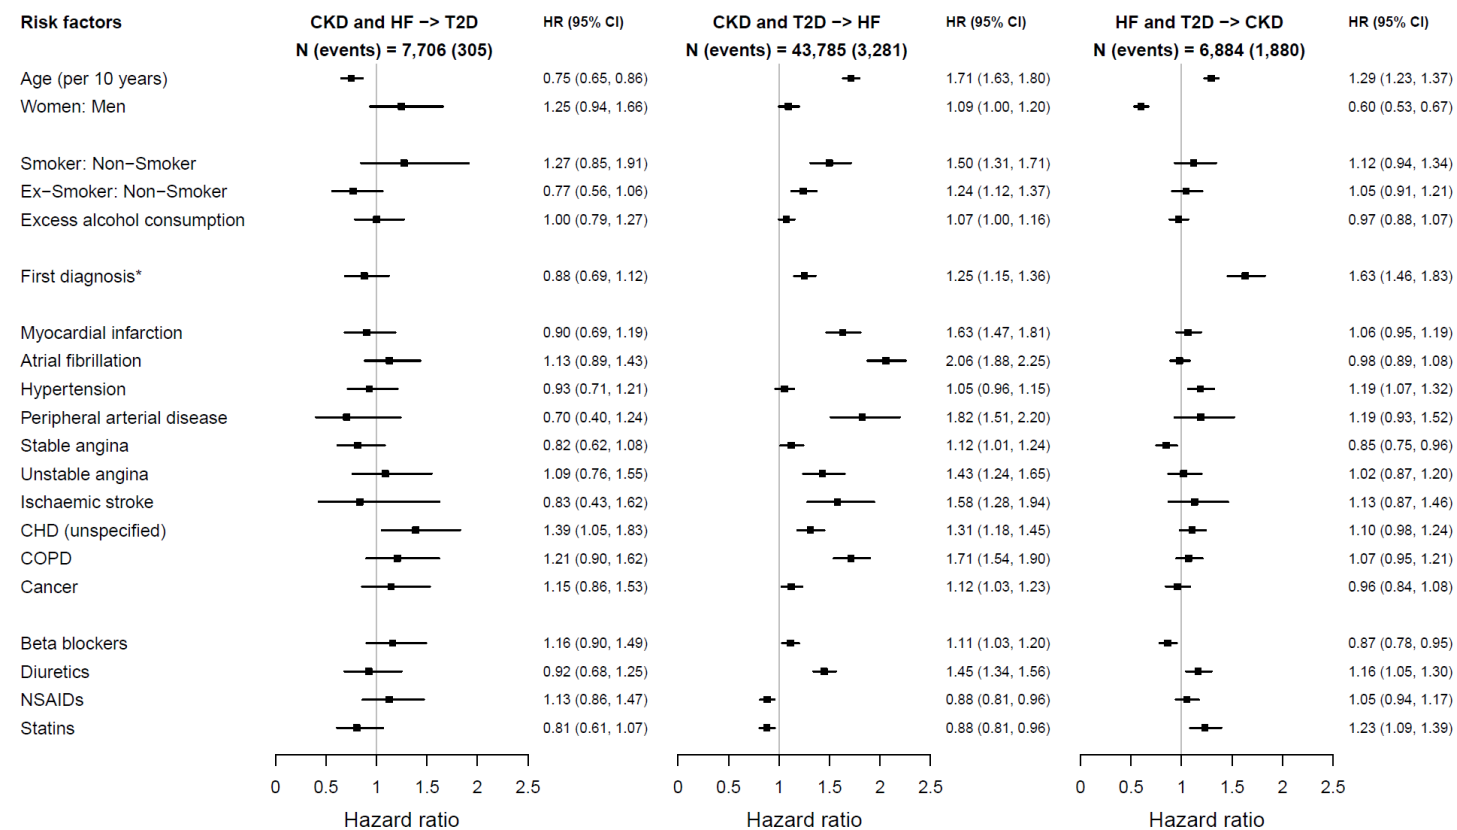

\*For first diagnosis, HF is the reference group for CKD and HF, CKD is the reference group for CKD and T2D and HF is the reference group for HF and T2D.

Note: The upper and lower limits for each point are the 95% confidence intervals. These models were also adjusted for the continuous variables modelled using restricted cubic splines displayed in figure S13.

**Figure S13: Restricted cubic splines to model continuous biomarkers in the multivariable Cox regression models on complete case data: Risk factors for developing a third condition in disease pairs of heart failure, chronic kidney disease and type 2 diabetes**

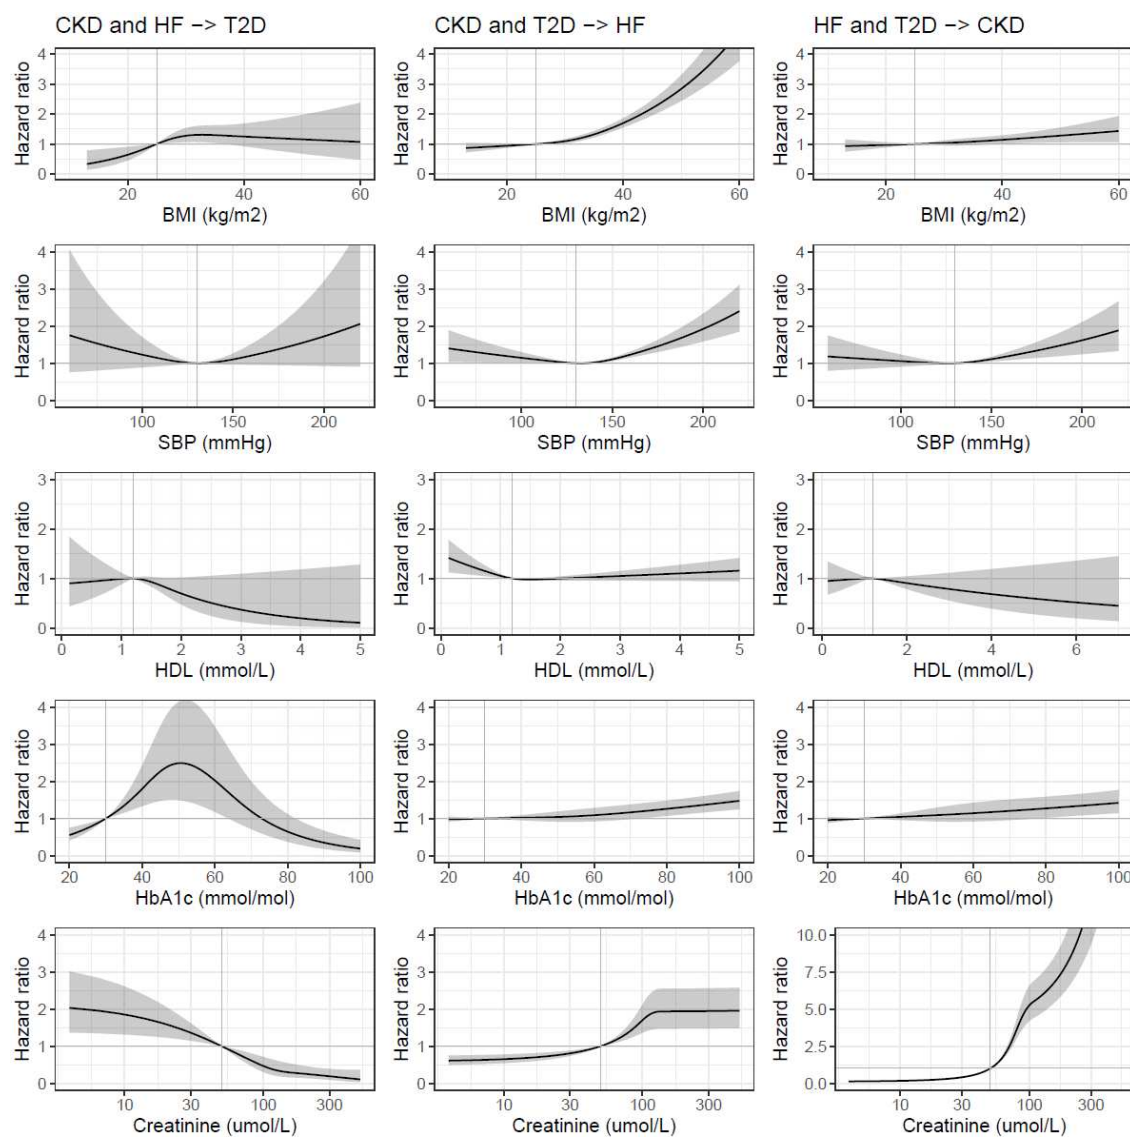

Note: The reference value for each risk factor was BMI: 25kg/m<sup>2</sup>, SBP: 130mmHg, HDL: .1.2mmol/L, HbA1c: 30 mmol/mol and creatinine: 50µmol/L. The shaded area in each panel is the 95% confidence interval. All estimates are from the fully adjusted model including the risk factors displayed in figure S12



**Figure S14: Risk of all-cause mortality in disease pairs of heart failure, chronic kidney disease and type 2 diabetes, using multivariable Cox regression models on complete case data**

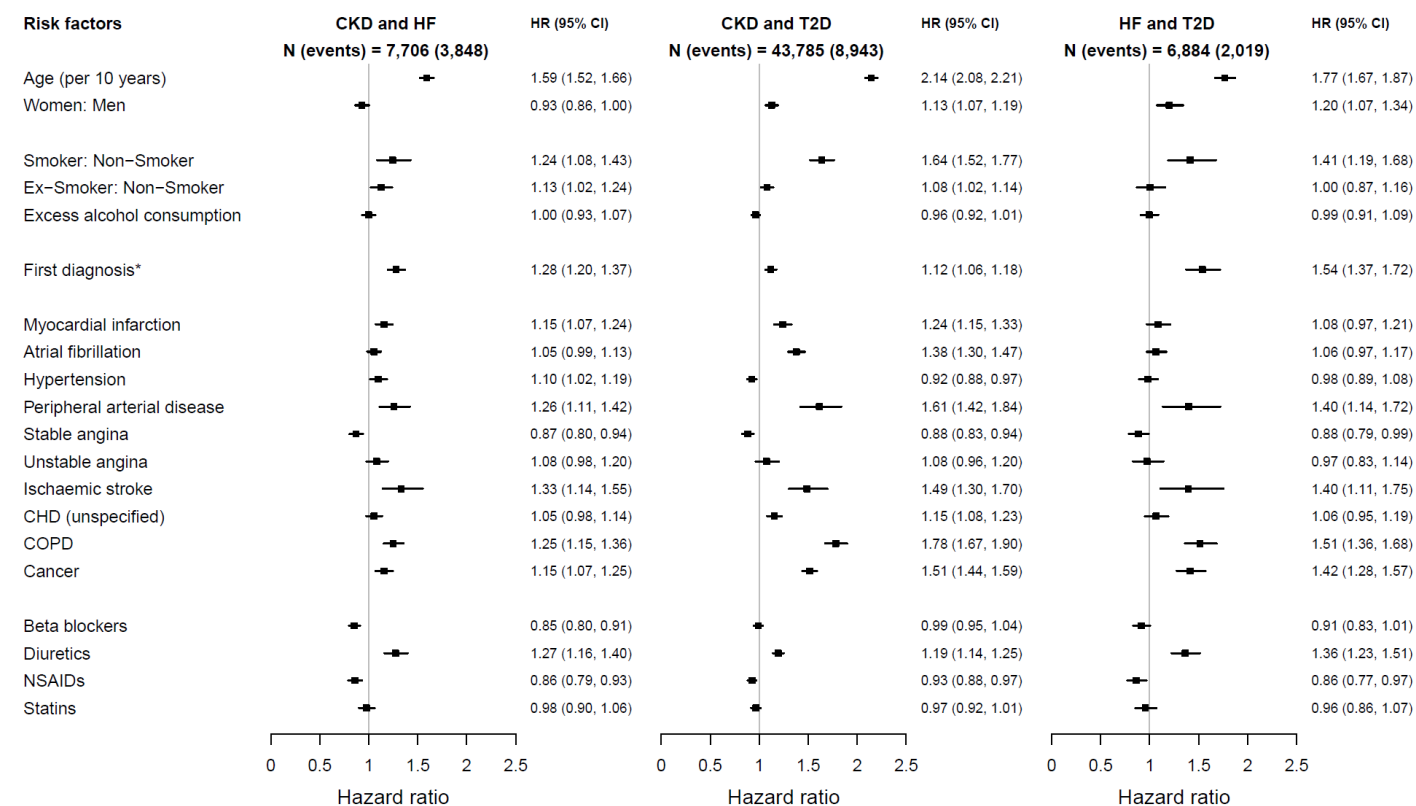

\*For first diagnosis, HF is the reference group for CKD and HF, CKD is the reference group for CKD and T2D and HF is the reference group for HF and T2D.

Note: The upper and lower limits for each point are the 95% confidence intervals. These models were also adjusted for the continuous variables modelled using restricted cubic splines displayed in figure S15.

**Figure S15: Restricted cubic splines to model continuous biomarkers in the multivariable Cox regression models on complete case data: Risk of all-cause mortality in disease pairs of heart failure, chronic kidney disease and type 2 diabetes**

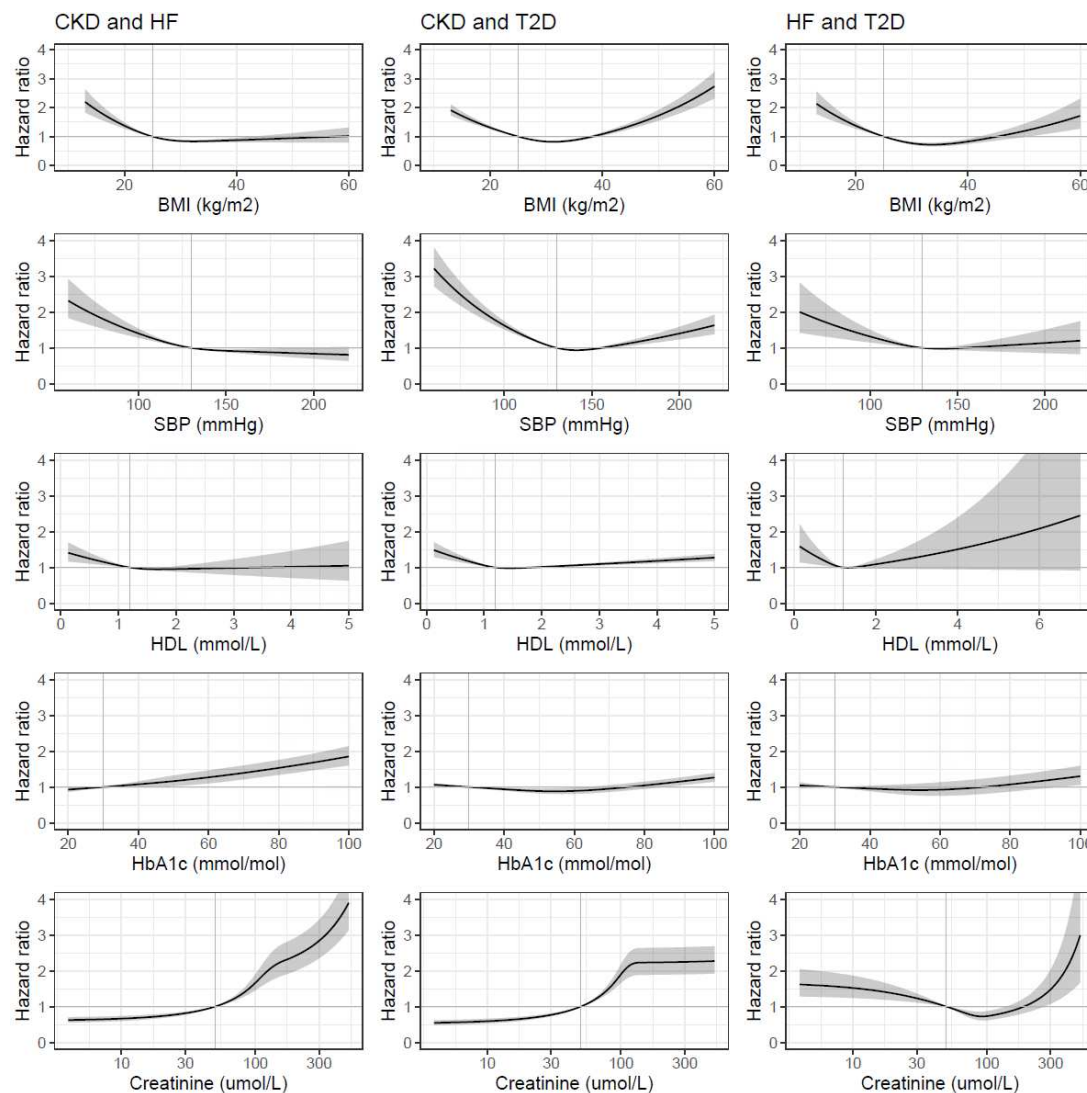

Note: The reference value for each risk factor was BMI: 25kg/m<sup>2</sup>, SBP: 130mmHg, HDL: 1.2mmol/L, HbA1c: 30 mmol/mol and creatinine: 50µmol/L. The shaded area in each panel is the 95% confidence interval. All estimates are from the fully adjusted model including the risk factors displayed in figure S14.

**Figure S16: Risk of cardiovascular death in disease pairs of heart failure, chronic kidney disease and type 2 diabetes, using multivariable Cox regression models on complete case data**

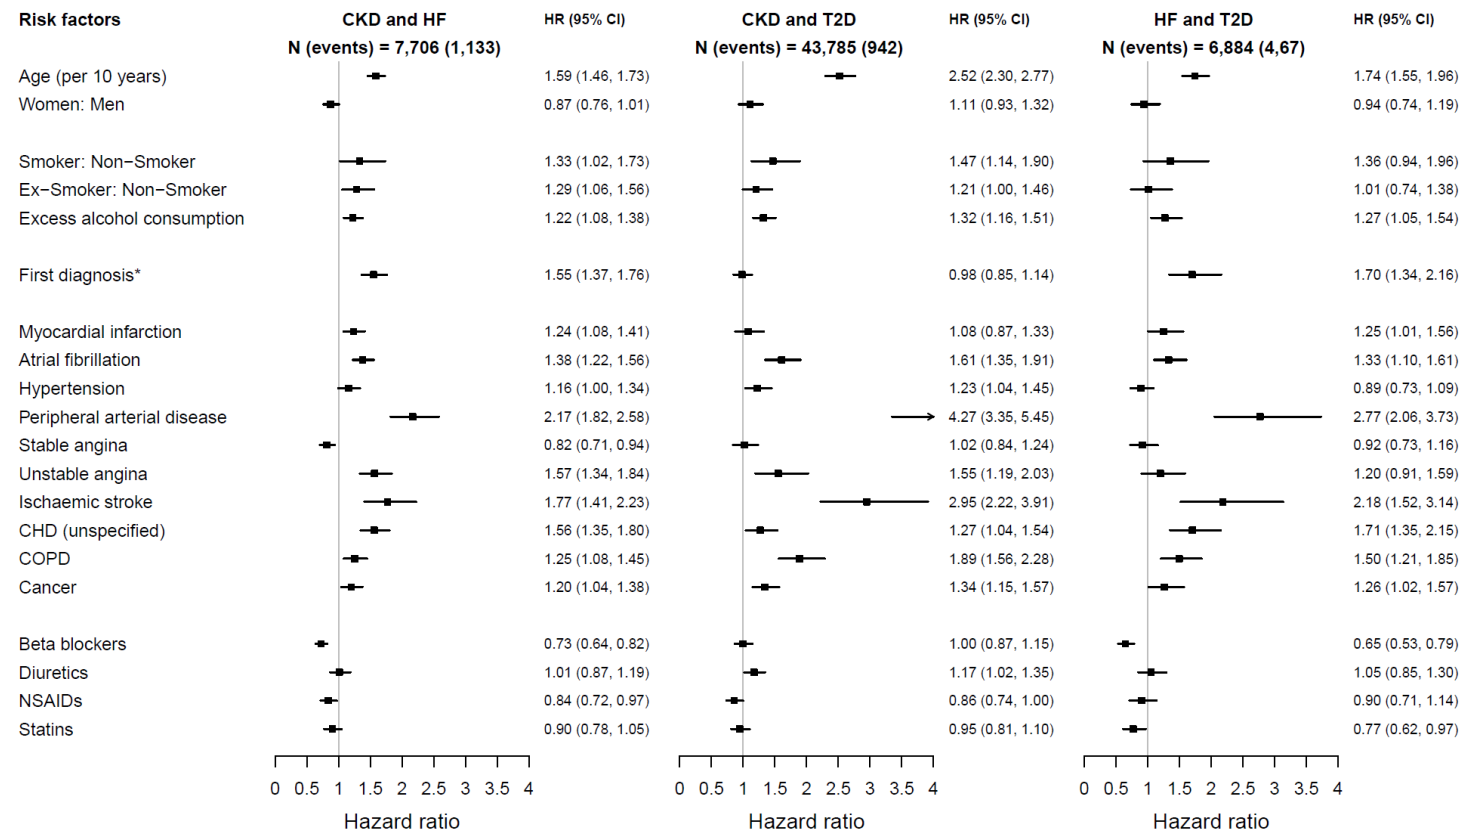

\*For first diagnosis, HF is the reference group for CKD and HF, CKD is the reference group for CKD and T2D and HF is the reference group for HF and T2D.

Note: The upper and lower limits for each point are the 95% confidence intervals. These models were also adjusted for the continuous variables modelled using restricted cubic splines displayed in figure S17.

**Figure S17: Restricted cubic splines to model continuous biomarkers in the multivariable Cox regression models on complete case data: Risk of cardiovascular death in disease pairs of heart failure, chronic kidney disease and type 2 diabetes**

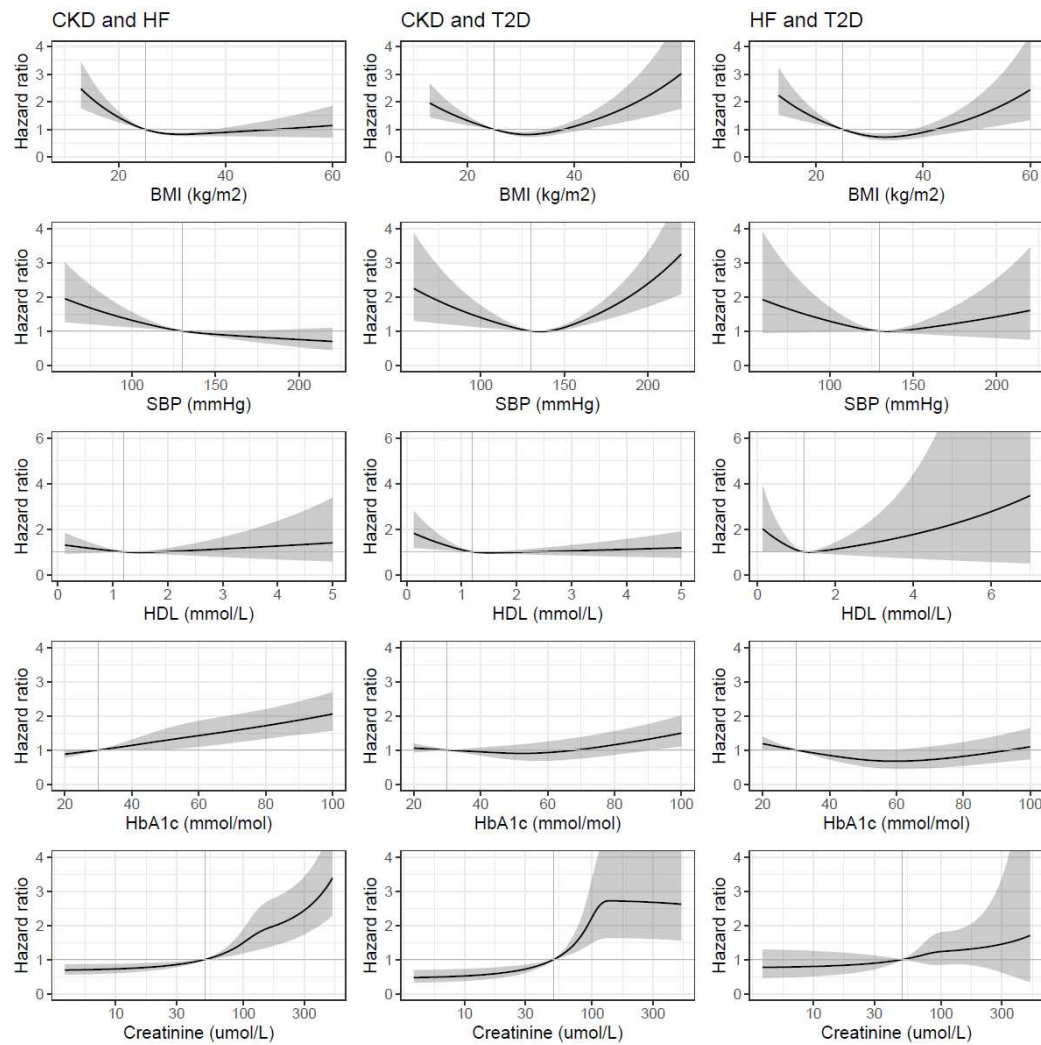

Note: The reference value for each risk factor was BMI: 25kg/m<sup>2</sup>, SBP: 130mmHg, HDL: 1.2mmol/L, HbA1c: 30 mmol/mol and creatinine: 50µmol/L. The shaded area in each panel is the 95% confidence interval. All estimates are from the fully adjusted model including the risk factors displayed in figure S16.

**Figure S18: Cumulative incidence functions estimating the probability of patients being diagnosed with a third condition in the presence of the competing risk of all-cause mortality**

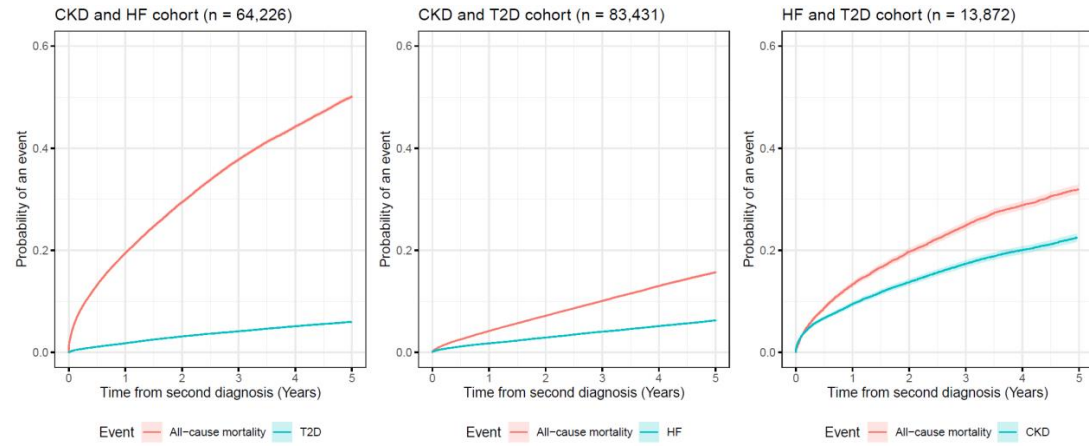

**Figure S19: Risk factors for developing third condition in disease pairs of heart failure, chronic kidney disease and type 2 diabetes, using multivariable Fine and Grey regression models on complete case data.**

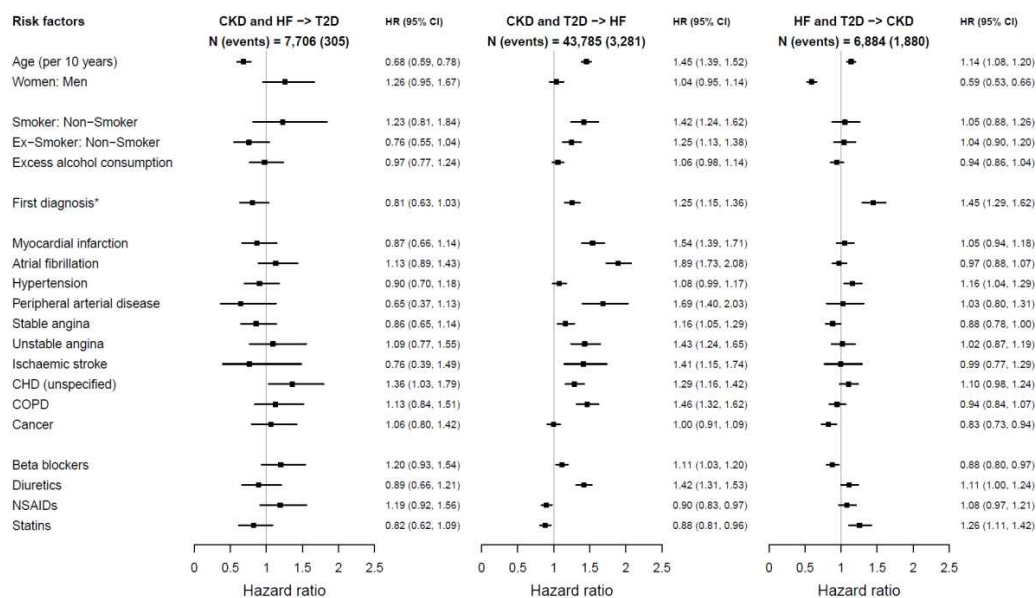

\*For first diagnosis, HF is the reference group for CKD and HF, CKD is the reference group for CKD and T2D and HF is the reference group for HF and T2D.

Note: The upper and lower limits for each point are the 95% confidence intervals. These models were also adjusted for the continuous variables modelled using restricted cubic splines displayed in figure S20.

**Figure S20: Restricted cubic splines to model continuous biomarkers in the multivariable Fine and Grey models on complete case data: Risk factors for developing a third condition in disease pairs of heart failure, chronic kidney disease and type 2 diabetes**

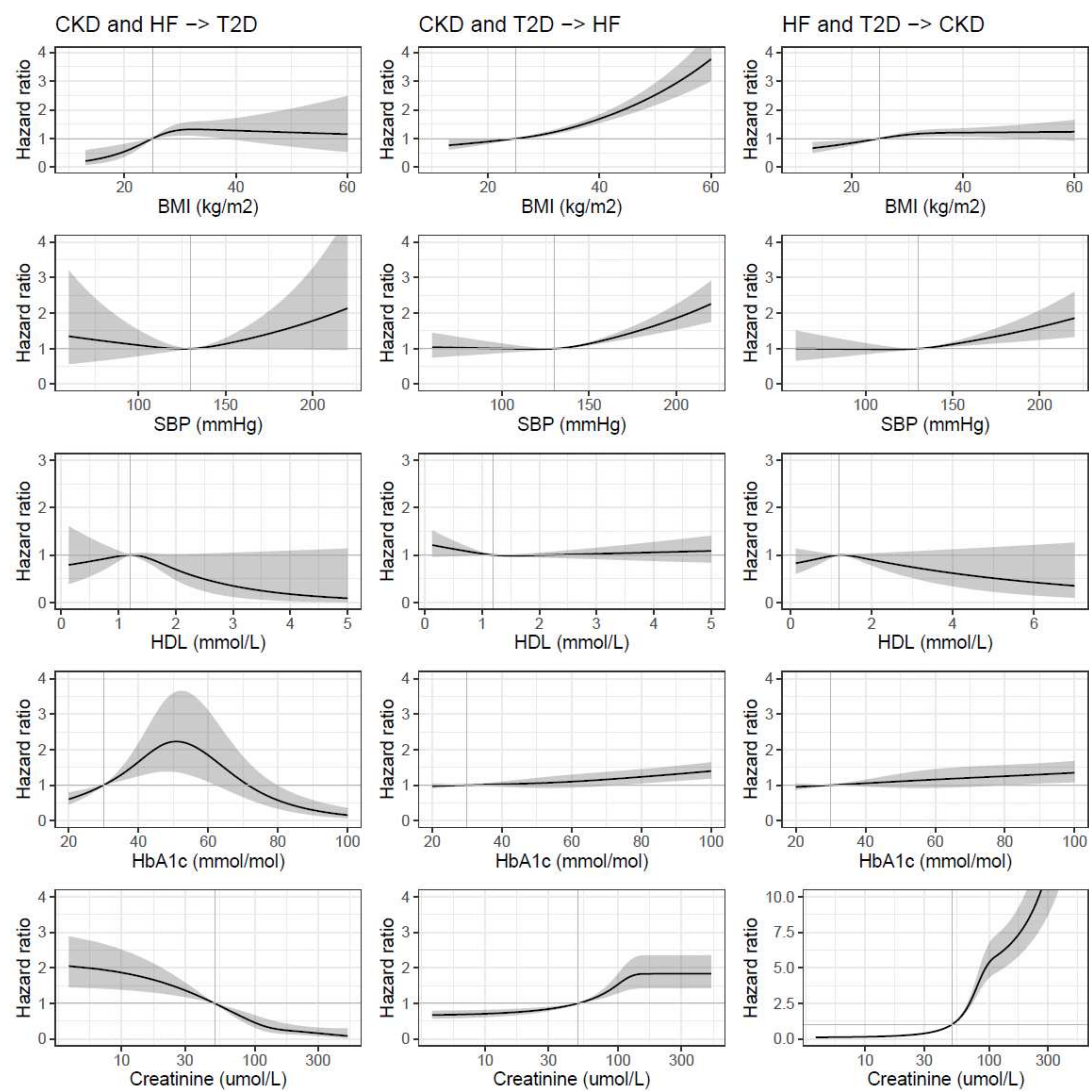

Note: The reference value for each risk factor was BMI: 25kg/m<sup>2</sup>, SBP: 130mmHg, HDL: 1.2mmol/L, HbA1c: 30 mmol/mol and creatinine: 50umol/L. The shaded area in each panel is the 95% confidence interval. All estimates are from the fully adjusted models including the risk factors displayed in figure S19.

Figure S21: Observed rate of healthcare utilisation in primary care setting

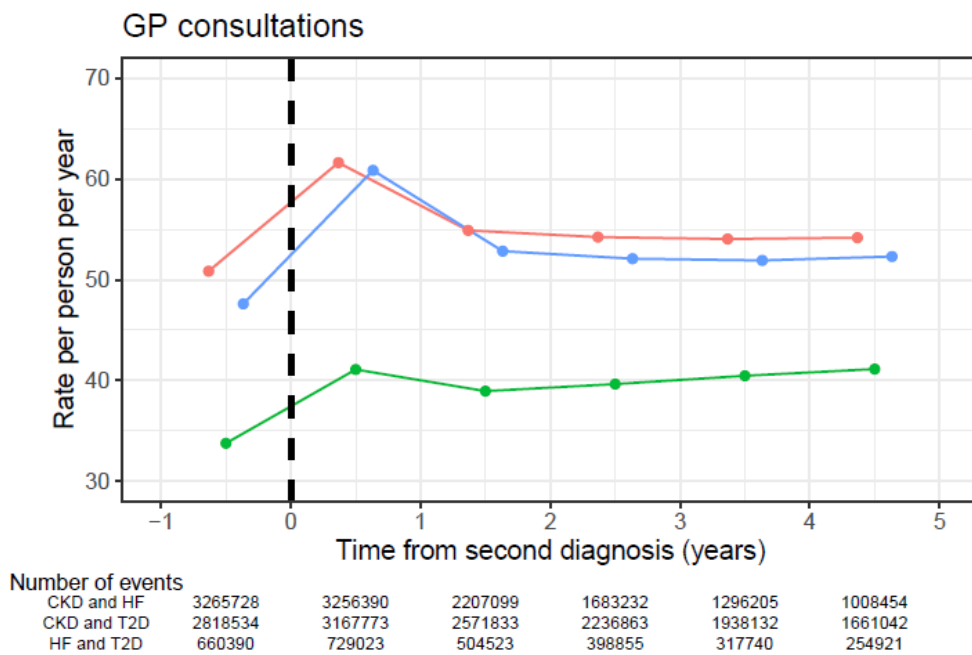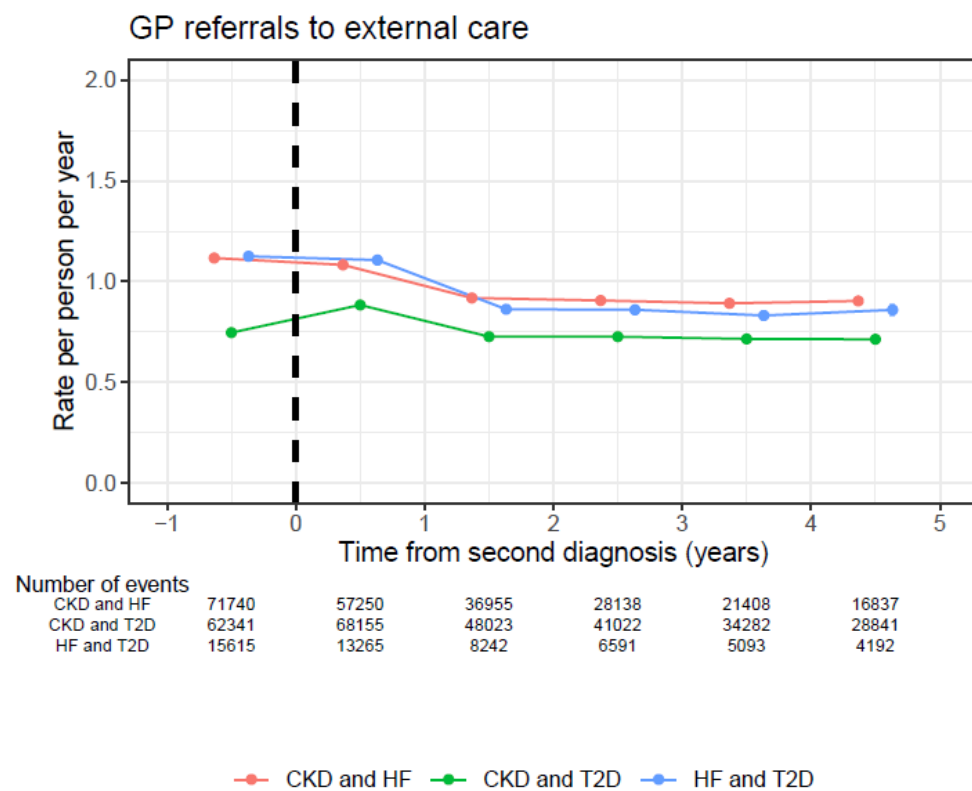



**Figure S22: Observed rate of healthcare utilisation in hospital setting**

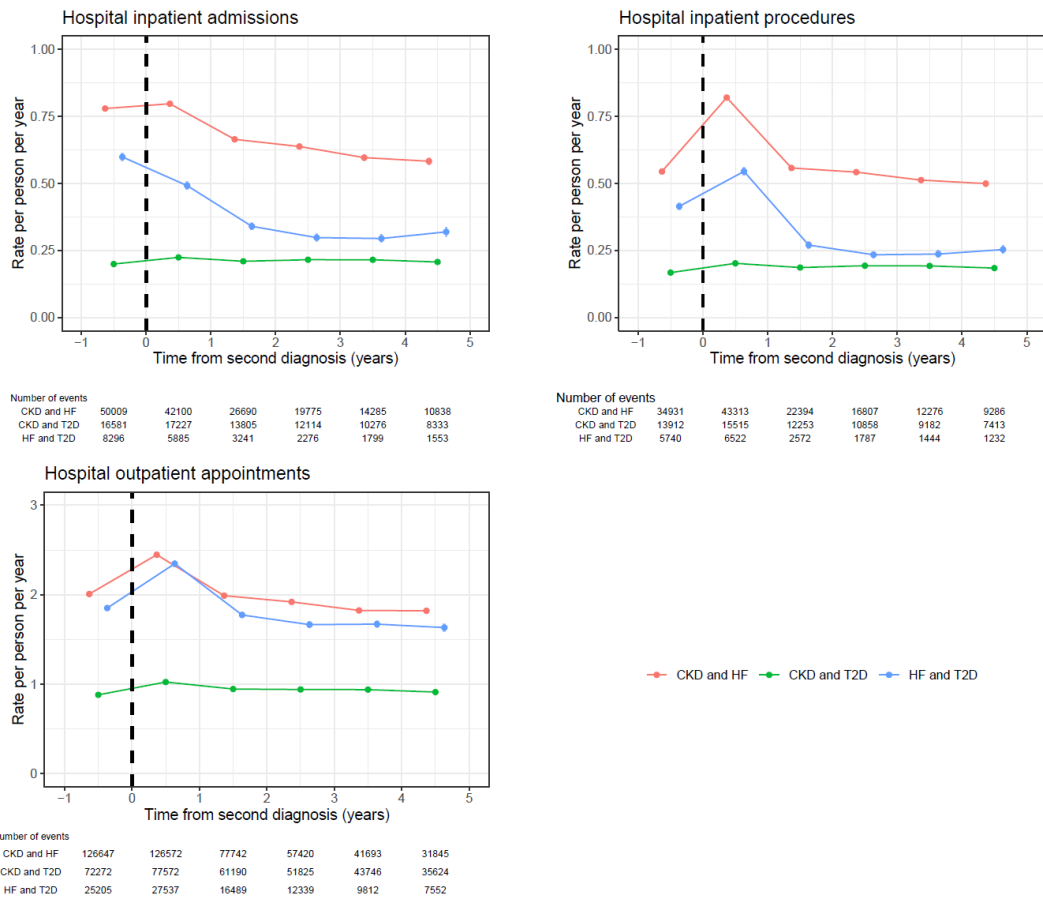

Note: Outpatient data limited to individuals who entered the cohort from 2003 onwards.
